# Supplementary material for: 3D bioprinted breast cancer model reveals stroma-mediated modulation of extracellular matrix and radiosensitivity
Source: PubMed Central journal article supplement — Bioact Mater. 2024 Sep 5;42:316–27. doi: 10.1016/j.bioactmat.2024.08.037 (PMC11405629; doi:10.1016/j.bioactmat.2024.08.037), 2024-09-05
Supplement: mmc1.pdf [file mmc1.pdf]

### 3D Bioprinted Breast Cancer Model Reveals Stroma-Mediated Modulation of Extracellular Matrix and Radiosensitivity

#### Supplementary data

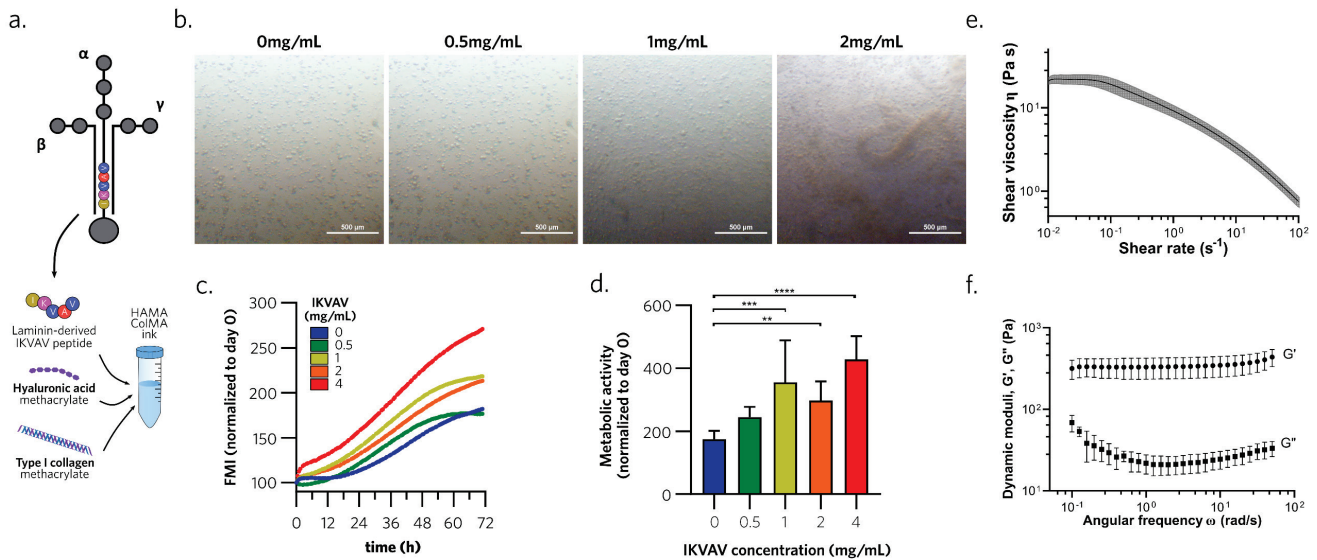

#### Supplementary Figure 1: IKVAV functionalized ink is mechanically suitable for bioprinting and supports MCF-7 growth.

**a.** Schematic representation of IKVAV peptide on laminin  $\alpha$  chain, that is mixed with hyaluronic acid and collagen type I to compose the final hydrogel. **b.** Brightfield imaging of IKVAV functionalized HAMA-ColMA hydrogel at various concentrations of IKVAV peptide. Aggregates can be observed at 2mg/mL. Scale bars: 500 $\mu$ m. **c.** MCF-7 GFP+ fluorescence mean intensity (FMI) (N=3 n=6-11) for 72h post-seeding in the hydrogel at displayed concentrations. **d.** Metabolic activity at 7 days (right, N=3 n=5-12) after seeding in IKVAV functionalized hydrogel at the displayed concentrations. **e.** Viscometry of the HAMA-ColMA ink functionalized with 1mg/mL of IKVAV (N=3). **f.** Rheology of the HAM-ColMA + 1mg/mL IKVAV photopolymerized hydrogel (N=3). Shown is mean  $\pm$  s.d. P values were computed with Kurskal Wallis test followed by Dunn's post hoc comparison test. \*\*P<0.01;\*\*\*P<0.001;\*\*\*\*P<0.0001.

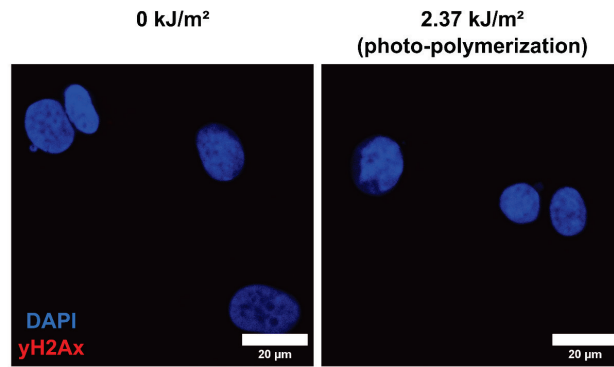

**Supplementary Figure 2: DNA integrity is not disrupted by photo-polymerization.**

Confocal images of MCF-7 cells stained for nucleus (DAPI, blue) and  $\gamma$ H2Ax (red), irradiated to different doses. Scale bar: 20 $\mu$ m.

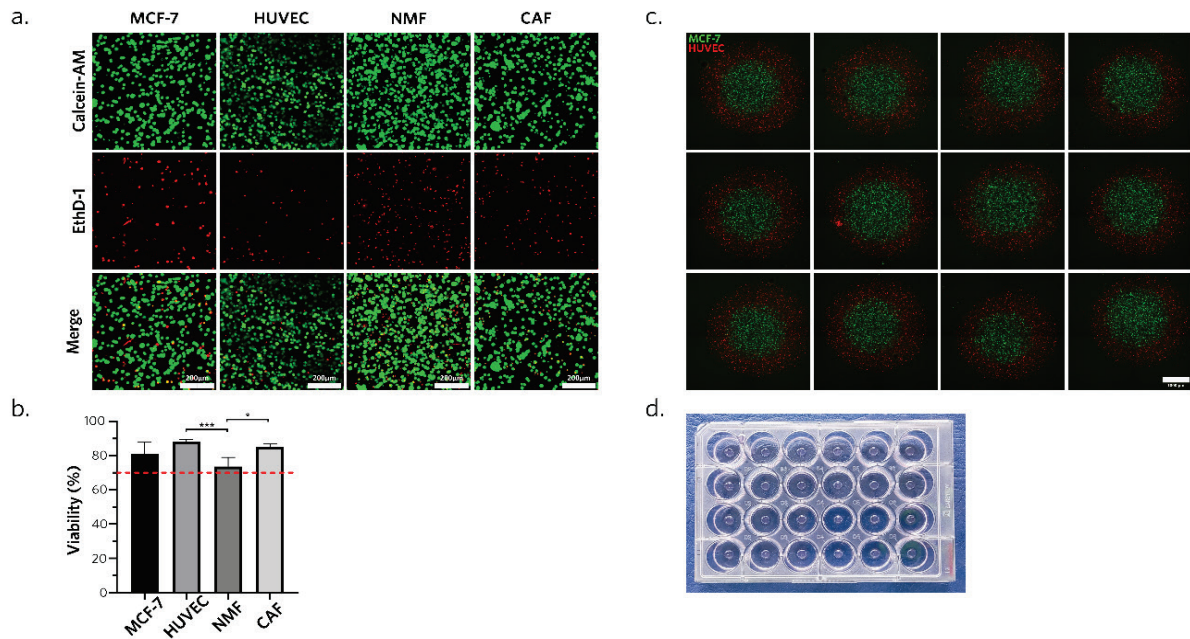

**Supplementary Figure 3: BpBCM is obtainable reproducibly in a medium throughput fashion without altering cell viability.**

**a.** Confocal images of the cell lines MCF-7, HUVEC, CAF and NMF bioprinted in the HAMA-ColMA-IKVAV hydrogel. Cells are stained with Calcein-AM (Live, green) and EthD-1 (Dead, red) 24h post-printing. Scale bars; 200µm. **b.** Viability quantification of the different cell lines 24h after microextrusion (N=3, n=5-13). The red dotted-line shows 70% viability limit from norm ISO-10993-5. **c.** Representative replicates of bioprinted models 4h post-printing. HUVEC mKate+ (red) were encapsulated in the stromal bioink and MCF-7 GFP+ (green) in the cancer bioink. Scale bar: 1000µm. **d.** Representative picture of a 24 well plate with models printed in the center of each well. Medium was removed from the wells for the picture. Shown are mean ± s.d. P values were computed by Kruskal-Wallis test followed by Dunn's post-hoc correction. \*p<0.05; \*\*\*p<0.001.

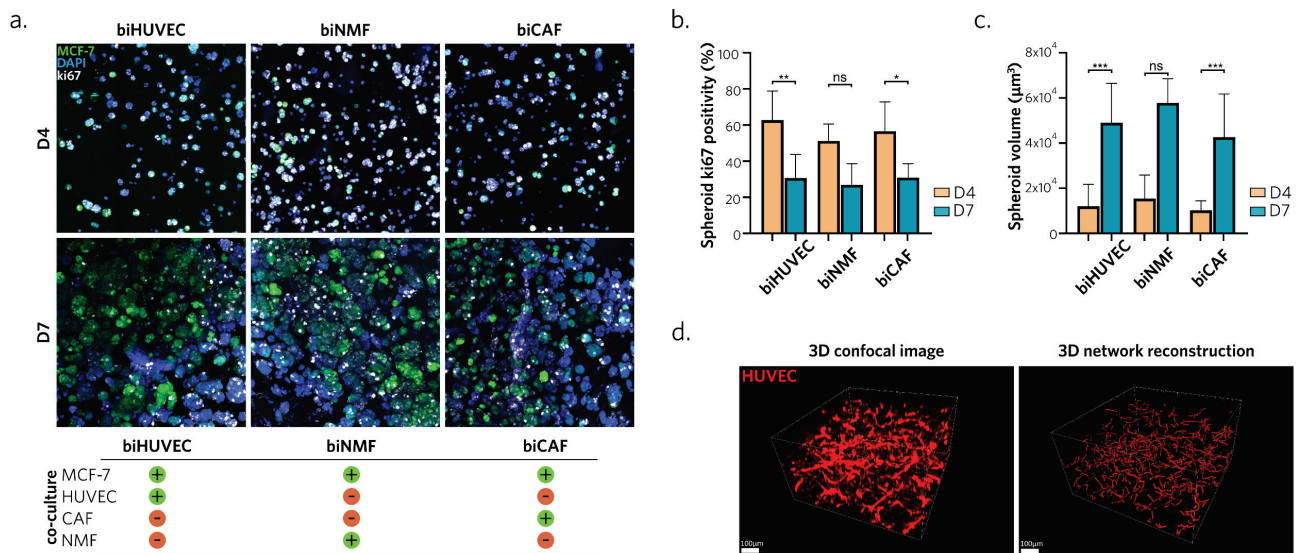

**Supplementary Figure 4: bicultures with stromal cells does not affect cancer cell maturation and triCAF microvascular network develops in 3D**

**a.** Representative ki67 immunostaining (gray), and stained nuclei using DAPI (blue), of BpBCM models printed with MCF-7 GFP+ (green) in co-culture conditions. Scale bar: 100µm.

**b,c.** Spheroid volume (**b**) and ki67 spheroid positivity (**c**) on day 4 and 7 in the different culture conditions (N=3, n=4-12). **d.** Representative 3D image and microvascular network reconstruction from a triCAF condition HUVEC (red) confocal acquisition. Scale bars: 100µm.

All data represent mean ± s.d. P-values were calculated with Kruskal-Wallis test corrected by Dunn's multiple comparison test. ns: non significant; \*P<0.05; \*\*P<0.01; \*\*\*P<0.001.

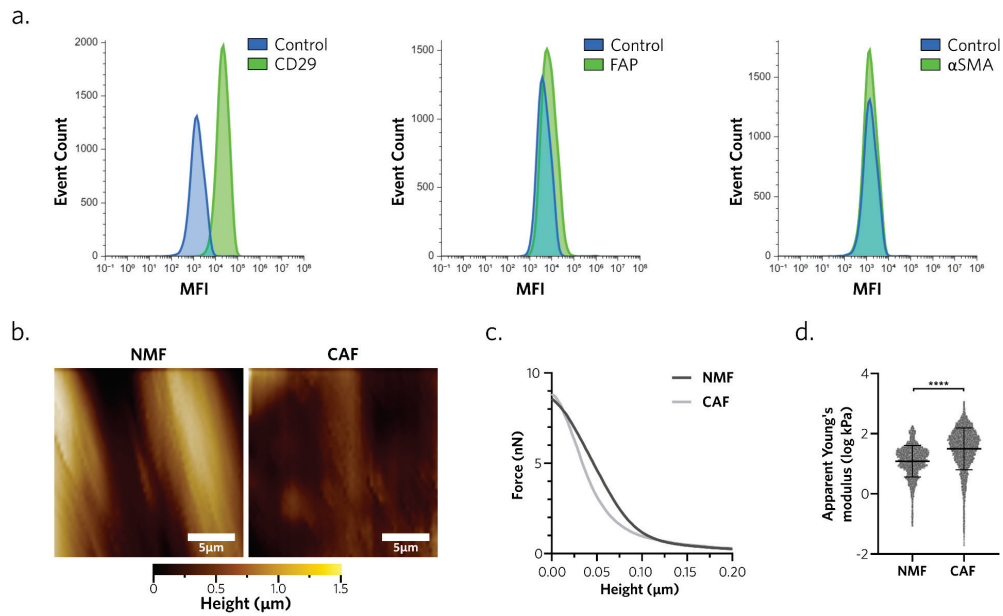

### Supplementary Figure 5: Proteomics analysis of matrix deposition by CAF and NMF

**a.** Flow cytometry mean fluorescence intensity histogram of CAF cells stained for CD29, FAP and  $\alpha$ SMA. Signal is compared to unstained cells as control. **b.** Topography images of atomic force microscopy experiment with similar surfaces. Scale bar: 5  $\mu\text{m}$ . **c.** Example force curve of CAF and NMF BpBCM. The steeper slope of CAF condition illustrates higher stiffness. **d.** Apparent Young's modulus distribution from individual curves measurement. Shown as mean  $\pm$  s.d. P-values were calculated with Kruskal-Wallis test corrected by Dunn's multiple comparison test. \*\*\*\* $p < 0.0001$ .



a.

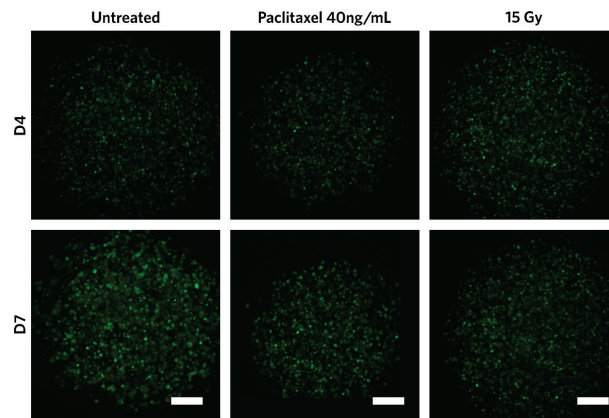

b.

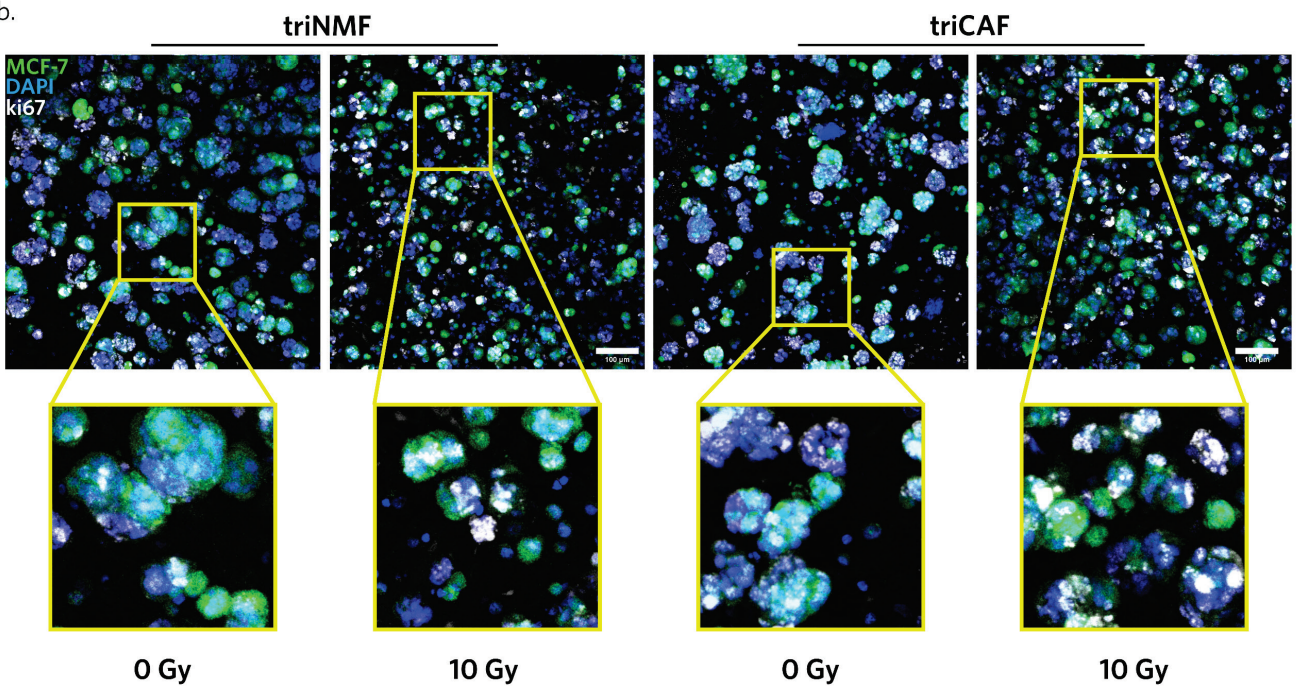

### Supplementary Figure 6: Treated models imaging.

**a.** Representative acquisitions by epifluorescence of treated MCF-7 GFP+ (green) models used for quantifications in Fig.5b,c. Only control and maximum doses are displayed. Scale bar: 500 $\mu$ m. **b.** Full-size and close-up of Fig.5d. Representative immunostaining for ki67 (gray), MCF-7 GFP+ (green), nuclei (blue) of triNMF and triCAF models after 0 or 10 Gy irradiations. Scale bar: 100 $\mu$ m.

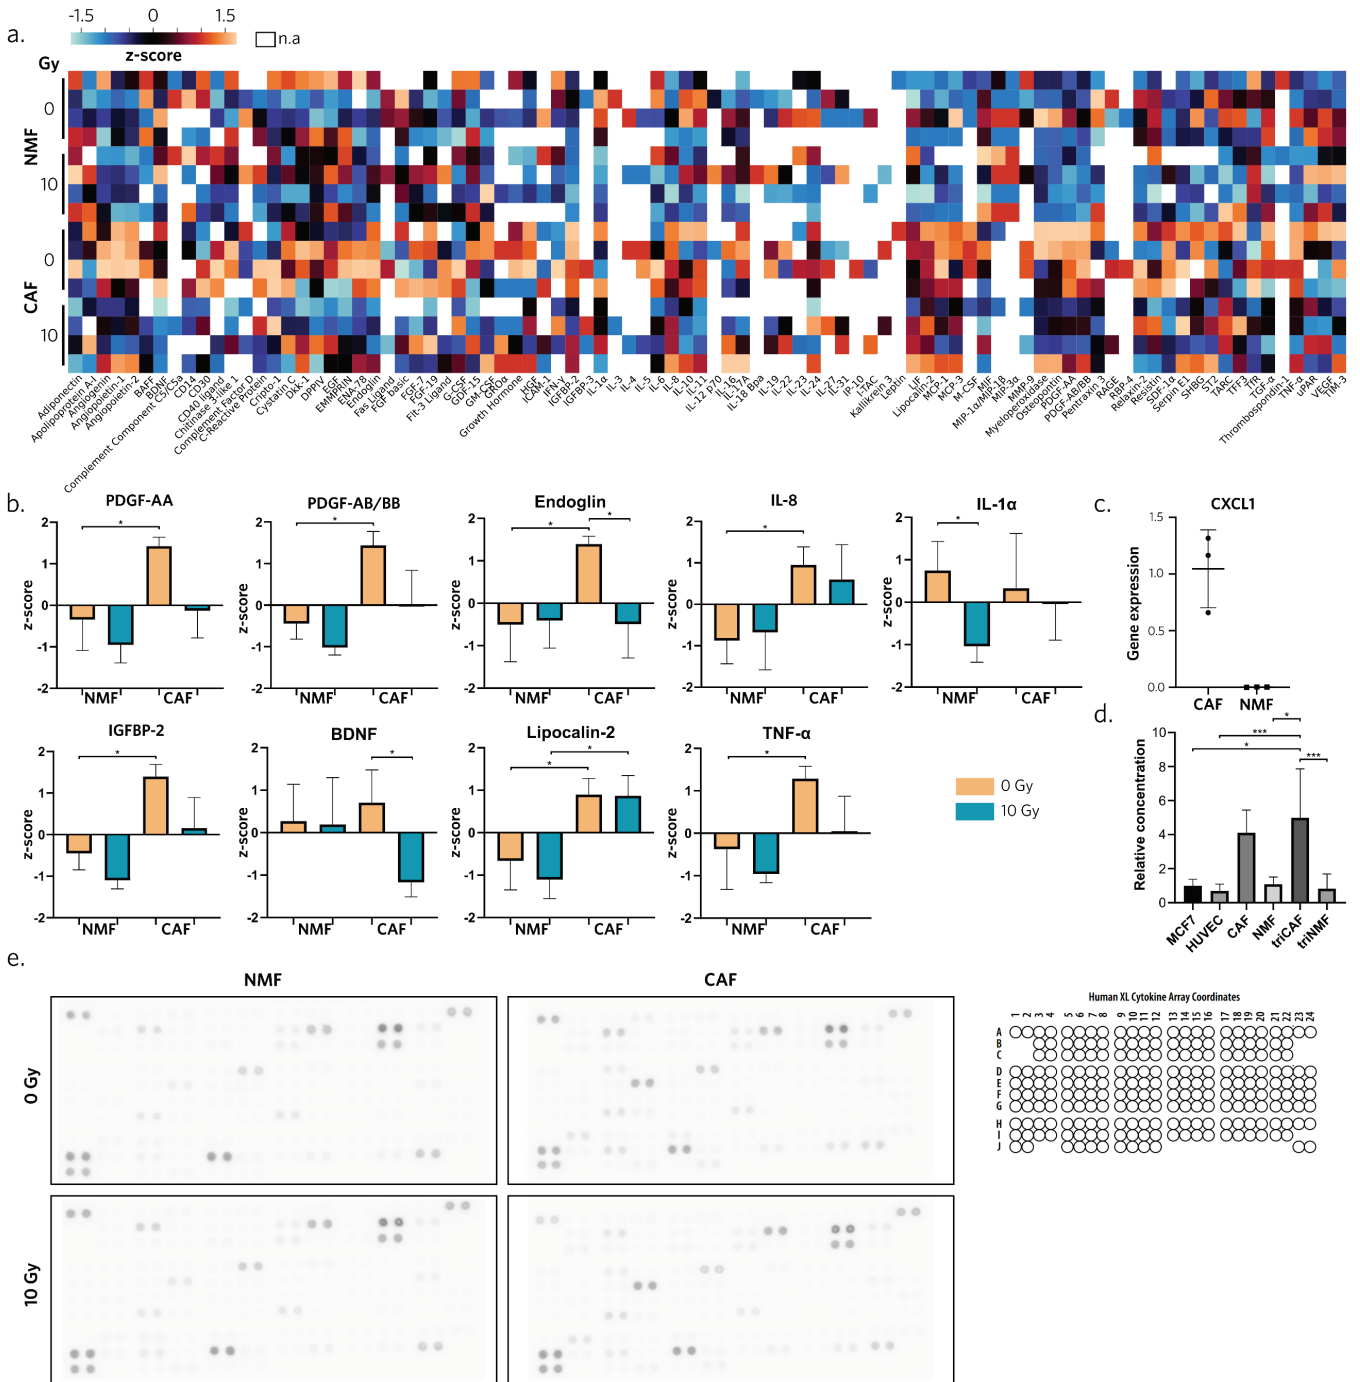

### Supplementary Figure 7: Treatment and paracrine communication

**a.** Heatmap of the 91 detected cytokines in BpBCM medium conditioned for 72h post-treatment on day 4 (N=4). **b.** Representation of cytokines showing significant regulation between CAF and NMF, or after treatment. **c.** Relative mRNA expression of CXCL-1 in CAF or NMF cells (N=3). **d.** Relative CXCL-1 concentrations in BpBCM models in mono- or tricultures medium conditioned for 72h from day 4 to day 7 (N=3, n=2-10). **e.** Representative membranes chemiluminescence reading from the dot blot assays and grid coordinates. Protein

coordinates are available in appendix of Supplementary information. Shown as mean  $\pm$  s.d. P-values were calculated with a 2-Way ANOVA corrected with Benjamini-Hochberg method (**b**) and Kruskal-Wallis test corrected by Dunn's multiple comparison test (**d**). \* $p < 0.05$ ; \*\*\* $p < 0.001$ .



### **Supplementary Video 1: Single model bioprinting**

Video of the bioprinting process. The cancer center is deposited (slow motion) by a first printhead and pre-polymerized for 5s. A second printhead surrounds the center with the stromal periphery (slow motion) and the whole model is photo-polymerized for 30s.

### **Supplementary Video 2: Multimodel bioprinting**

Video (speed x5) of the bioprinting process in a 24 well plate support. An additional printhead was used to dispense medium after each print.

### **Supplementary Video 3: MDA-MB-231 BpBCM invasion**

3D reconstruction of a BpBCM printed with MDA-MB-231 breast cancer cell line (green) in the center cancer area instead of MCF-7. MDA-MB-231 cells are invading the stroma composed of fibroblasts and HUVEC (red) after 7 days. Scale bar: dynamic, visible on the video.

### **Supplementary Video 4: HRE-dUnaG model timelapse**

Timelapse imaging of a BpBCM containing a cancer center with MCF-7 transduced with the HRE-dUnaG reporter (Green). The model was followed in brightfield (grey) and images were taken every 2h for 7 days. Scale bar: 1000 $\mu$ m.

### **Appendix**

Dot blot protein coordinates.pdf

(from R&D Systems Proteome Profiler Human XL Cytokine Array manual ; Kit Catalog #: ARY022B)

## APPENDIX

Refer to the table below for the Human XL Cytokine Array coordinates.

| Coordinate | Analyte/Control             | Entrez Gene ID | Alternate Nomenclature                |
|------------|-----------------------------|----------------|---------------------------------------|
| A1, A2     | Reference Spots             | N/A            | RS                                    |
| A3, A4     | Adiponectin                 | 9370           | Acrp30                                |
| A5, A6     | Apolipoprotein A-I          | 335            | ApoA1                                 |
| A7, A8     | Angiogenin                  | 283            | —————                                 |
| A9, A10    | Angiopoietin-1              | 284            | Ang-1, ANGPT1                         |
| A11, A12   | Angiopoietin-2              | 285            | Ang-2, ANGPT2                         |
| A13, A14   | BAFF                        | 10673          | BlyS, TNFSF13B                        |
| A15, A16   | BDNF                        | 627            | Brain-derived Neurotrophic Factor     |
| A17, A18   | Complement Component C5/C5a | 727            | C5/C5a                                |
| A19, A20   | CD14                        | 929            | —————                                 |
| A21, A22   | CD30                        | 943            | TNFRSF8                               |
| A23, A24   | Reference Spots             | N/A            | RS                                    |
| B3, B4     | CD40 ligand                 | 959            | CD40L, TNFSF5, CD154, TRAP            |
| B5, B6     | Chitinase 3-like 1          | 1116           | CHI3L1, YKL-40                        |
| B7, B8     | Complement Factor D         | 1675           | Adipsin, CFD                          |
| B9, B10    | C-Reactive Protein          | 1401           | CRP                                   |
| B11, B12   | Cripto-1                    | 6997           | Teratocarcinoma-derived Growth Factor |
| B13, B14   | Cystatin C                  | 1471           | CST3, ARMD11                          |
| B15, B16   | Dkk-1                       | 22943          | Dickkopf-1                            |
| B17, B18   | DPPIV                       | 1803           | CD26, DPP4, Dipeptidyl-peptidase IV   |
| B19, B20   | EGF                         | 1950           | Epidermal Growth Factor               |
| B21, B22   | EMMPRIN                     | 682            | CD147, Basigin                        |
| C3, C4     | ENA-78                      | 6374           | CXCL5                                 |
| C5, C6     | Endoglin                    | 2022           | CD105, ENG                            |
| C7, C8     | Fas Ligand                  | 356            | TNFSF6, CD178, CD95L                  |
| C9, C10    | FGF basic                   | 2247           | FGF-2                                 |
| C11, C12   | FGF-7                       | 2252           | KGF                                   |
| C13, C14   | FGF-19                      | 9965           | —————                                 |
| C15, C16   | Flt-3 Ligand                | 2323           | FLT3LG                                |
| C17, C18   | G-CSF                       | 1440           | CSF3                                  |
| C19, C20   | GDF-15                      | 9518           | MIC-1                                 |
| C21, C22   | GM-CSF                      | 1437           | CSF2                                  |
| D1, D2     | GRO $\alpha$                | 2919           | CXCL1, MSGA- $\alpha$                 |
| D3, D4     | Growth Hormone              | 2688           | GH, Somatotropin                      |
| D5, D6     | HGF                         | 3082           | Scatter Factor, SF                    |
| D7, D8     | ICAM-1                      | 3383           | CD54                                  |
| D9, D10    | IFN- $\gamma$               | 3458           | IFNG                                  |
| D11, D12   | IGFBP-2                     | 3485           | —————                                 |

## APPENDIX CONTINUED

| Coordinate | Analyte/Control | Entrez Gene ID | Alternate Nomenclature         |
|------------|-----------------|----------------|--------------------------------|
| D13, D14   | IGFBP-3         | 3486           | ————                           |
| D15, D16   | IL-1 $\alpha$   | 3552           | IL-1F1                         |
| D17, D18   | IL-1 $\beta$    | 3553           | IL-1F2                         |
| D19, D20   | IL-1ra          | 3557           | IL-1F3                         |
| D21, D22   | IL-2            | 3558           | ————                           |
| D23, D24   | IL-3            | 3562           | ————                           |
| E1, E2     | IL-4            | 3565           | ————                           |
| E3, E4     | IL-5            | 3567           | ————                           |
| E5, E6     | IL-6            | 3569           | ————                           |
| E7, E8     | IL-8            | 3576           | CXCL8                          |
| E9, E10    | IL-10           | 3586           | ————                           |
| E11, E12   | IL-11           | 3589           | ————                           |
| E13, E14   | IL-12 p70       | 3593           | ————                           |
| E15, E16   | IL-13           | 3596           | ————                           |
| E17, E18   | IL-15           | 3600           | ————                           |
| E19, E20   | IL-16           | 3603           | ————                           |
| E21, E22   | IL-17A          | 3605           | IL-17, CTLA8                   |
| E23, E24   | IL-18 Bpa       | 10068          | ————                           |
| F1, F2     | IL-19           | 29949          | ————                           |
| F3, F4     | IL-22           | 50616          | IL-TIF                         |
| F5, F6     | IL-23           | 51561          | IL-23A, SGRF                   |
| F7, F8     | IL-24           | 11009          | C49A, FISP, MDA-7, MOB-5, ST16 |
| F9, F10    | IL-27           | 246778         | ————                           |
| F11, F12   | IL-31           | 386653         | ————                           |
| F13, F14   | IL-32           | 9235           | ————                           |
| F15, F16   | IL-33           | 90865          | C9orf26, DVS27, NF-HEV         |
| F17, F18   | IL-34           | 146433         | C16orf77                       |
| F19, F20   | IP-10           | 3627           | CXCL10                         |
| F21, F22   | I-TAC           | 6373           | CXCL11, SCYB9B                 |
| F23, F24   | Kallikrein 3    | 354            | PSA, KLK3                      |
| G1, G2     | Leptin          | 3952           | OB                             |
| G3, G4     | LIF             | 3976           | ————                           |
| G5, G6     | Lipocalin-2     | 3934           | NGAL, LCN2, Siderocalin        |
| G7, G8     | MCP-1           | 6347           | CCL2, MCAF                     |
| G9, G10    | MCP-3           | 6354           | CCL7, MARC                     |
| G11, G12   | M-CSF           | 1435           | CSF1                           |
| G13, G14   | MIF             | 4282           | ————                           |
| G15, G16   | MIG             | 4283           | CXCL9                          |

## APPENDIX CONTINUED

| Coordinate | Analyte/Control               | Entrez Gene ID | Alternate Nomenclature |
|------------|-------------------------------|----------------|------------------------|
| G17, G18   | MIP-1 $\alpha$ /MIP-1 $\beta$ | 6348/6351      | CCL3/CCL4              |
| G19, G20   | MIP-3 $\alpha$                | 6364           | CCL20, Exodus-1, LARC  |
| G21, G22   | MIP-3 $\beta$                 | 6363           | CCL19, ELC             |
| G23, G24   | MMP-9                         | 4318           | CLG4B, Gelatinase B    |
| H1, H2     | Myeloperoxidase               | 4353           | MPO, Lactoperoxidase   |
| H3, H4     | Osteopontin                   | 6696           | OPN                    |
| H5, H6     | PDGF-AA                       | 5154           | _____                  |
| H7, H8     | PDGF-AB/BB                    | 5154/5155      | _____                  |
| H9, H10    | Pentraxin 3                   | 5806           | PTX3, TSG-14           |
| H11, H12   | PF4                           | 5196           | CXCL4                  |
| H13, H14   | RAGE                          | 177            | _____                  |
| H15, H16   | RANTES                        | 6352           | CCL5                   |
| H17, H18   | RBP-4                         | 5950           | _____                  |
| H19, H20   | Relaxin-2                     | 6019           | RLN2, RLXH2            |
| H21, H22   | Resistin                      | 56729          | ADSF, FIZZ3, RETN      |
| H23, H24   | SDF-1 $\alpha$                | 6387           | CXCL12, PBSF           |
| I1, I2     | Serpin E1                     | 5054           | PAI-I, PAI-1, Nexin    |
| I3, I4     | SHBG                          | 6462           | ABP                    |
| I5, I6     | ST2                           | 9173           | IL-1 R4, IL1RL1, ST2L  |
| I7, I8     | TARC                          | 6361           | CCL17                  |
| I9, I10    | TFF3                          | 7033           | ITF, TFI               |
| I11, I12   | TfR                           | 7037           | CD71, TFR1, TFRC, TRFR |
| I13, I14   | TGF- $\alpha$                 | 7039           | TGFA                   |
| I15, I16   | Thrombospondin-1              | 7057           | THBS1, TSP-1           |
| I17, I18   | TNF- $\alpha$                 | 7124           | TNFSF1A                |
| I19, I20   | uPAR                          | 5329           | PLAUR                  |
| I21, I22   | VEGF                          | 7422           | BEGFA                  |
| J1, J2     | Reference Spots               | N/A            | RS                     |
| J5, J6     | Vitamin D BP                  | 2638           | VDB, DBP, VDBP         |
| J7, J8     | CD31                          | 5175           | PECAM-1                |
| J9, J10    | TIM-3                         | 84868          | HAVCR2                 |
| J11, J12   | VCAM-1                        | 7412           | CD106                  |
| J23, J24   | Negative Controls             | N/A            | Control (-)            |
